# Supplementary material
Source: Royal Society of Chemistry journal article supplement (doi:10.1039/d6eb00043f)
Supplement: d6eb00043f1.pdf [file d6eb00043f1.pdf]

## SI Figure 1

| <b>Sample</b>                  | <b>Bulk Resistance<br/>(<math>R_b</math>) (<math>\Omega \text{ cm}^2</math>)</b> | <b>Interfacial Resistance<br/>(<math>R_{int}</math>) (<math>\Omega \text{ cm}^2</math>)</b> |
|--------------------------------|----------------------------------------------------------------------------------|---------------------------------------------------------------------------------------------|
| 20 wt% TEGDME                  | 9                                                                                | 73                                                                                          |
| Neat $\text{Al}_2\text{O}_3$   | 15                                                                               | 80                                                                                          |
| A-174@ $\text{Al}_2\text{O}_3$ | 16                                                                               | 125                                                                                         |
| A-174@LLZO                     | 13                                                                               | 51                                                                                          |
| APTES@LLZO                     | 26                                                                               | 200                                                                                         |
