# Supplementary material
Source: Royal Society of Chemistry journal article supplement (doi:10.1039/d6eb00043f)
Supplement: d6eb00043f9.pdf [file d6eb00043f9.pdf]

## SI Figure 4

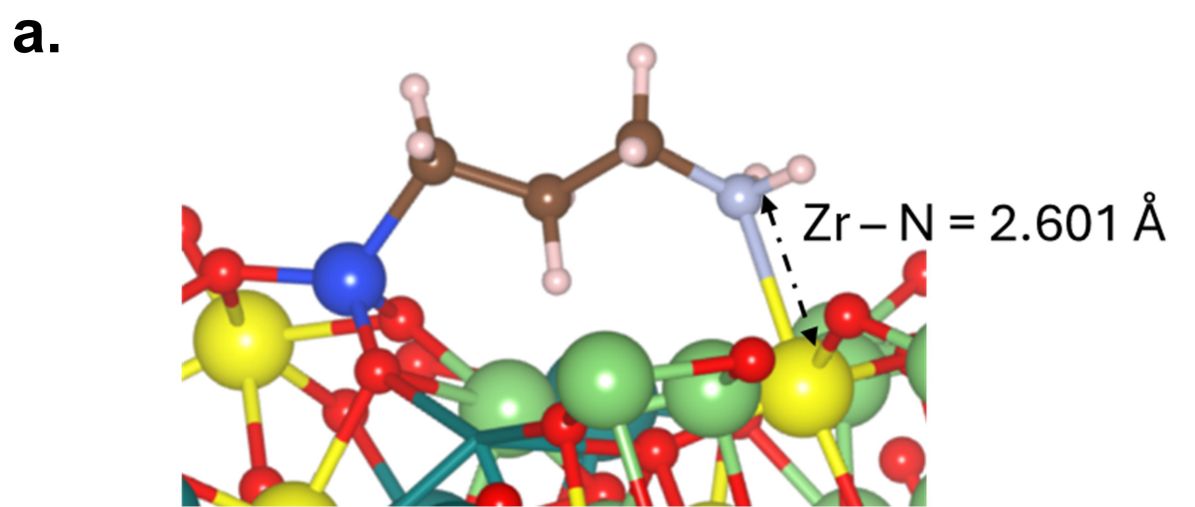

Surface of c-LLZO modified with (3-Aminopropyl) triethoxysilane

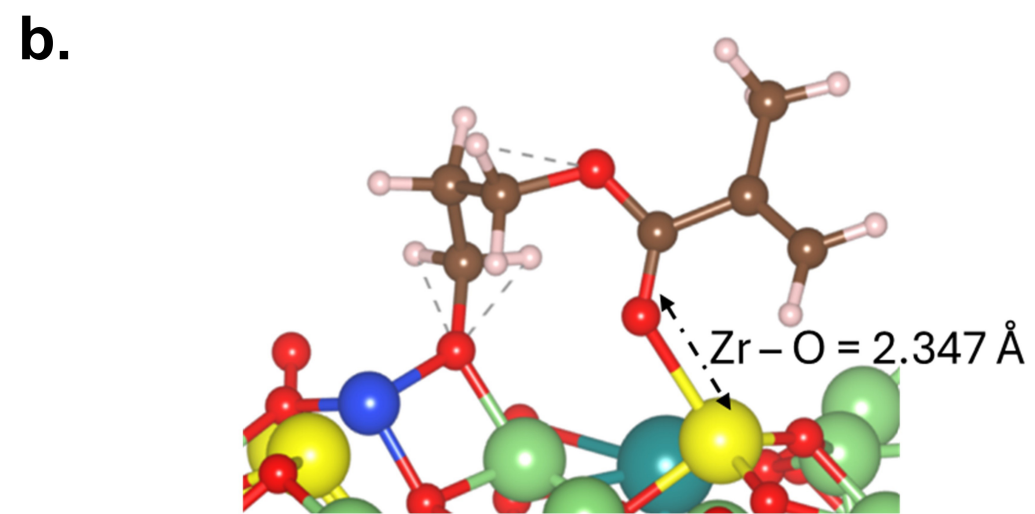

Surface of c-LLZO modified with (Methacryloxypropyl) trimethoxysilane
