# Supplementary material
Source: Royal Society of Chemistry journal article supplement (doi:10.1039/d6eb00043f)

SI Figure 5

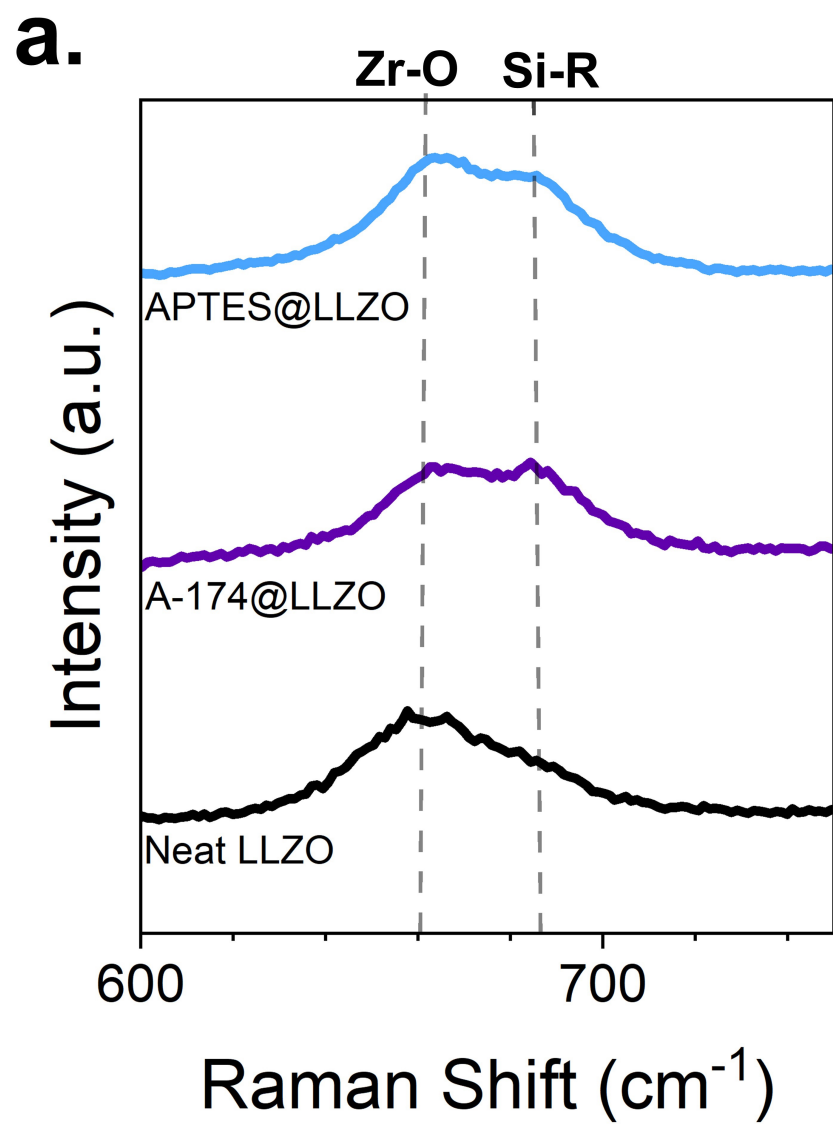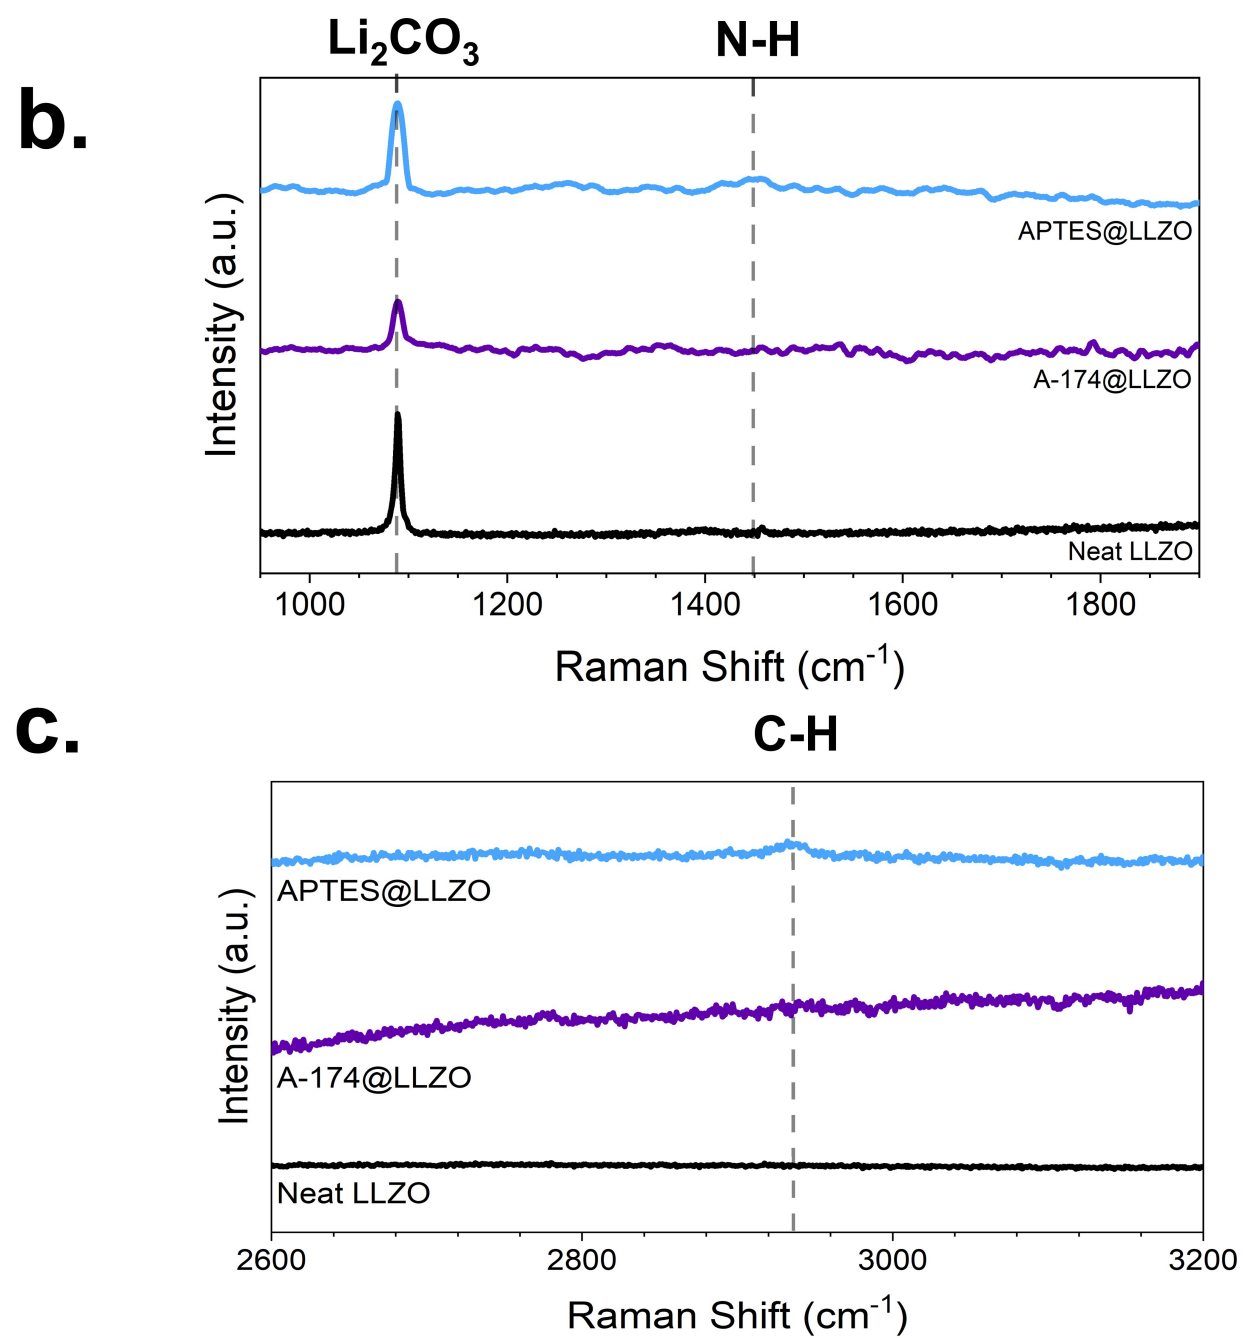

Supplement: d6eb00043f10.pdf [file d6eb00043f10.pdf]

## SI Figure 6

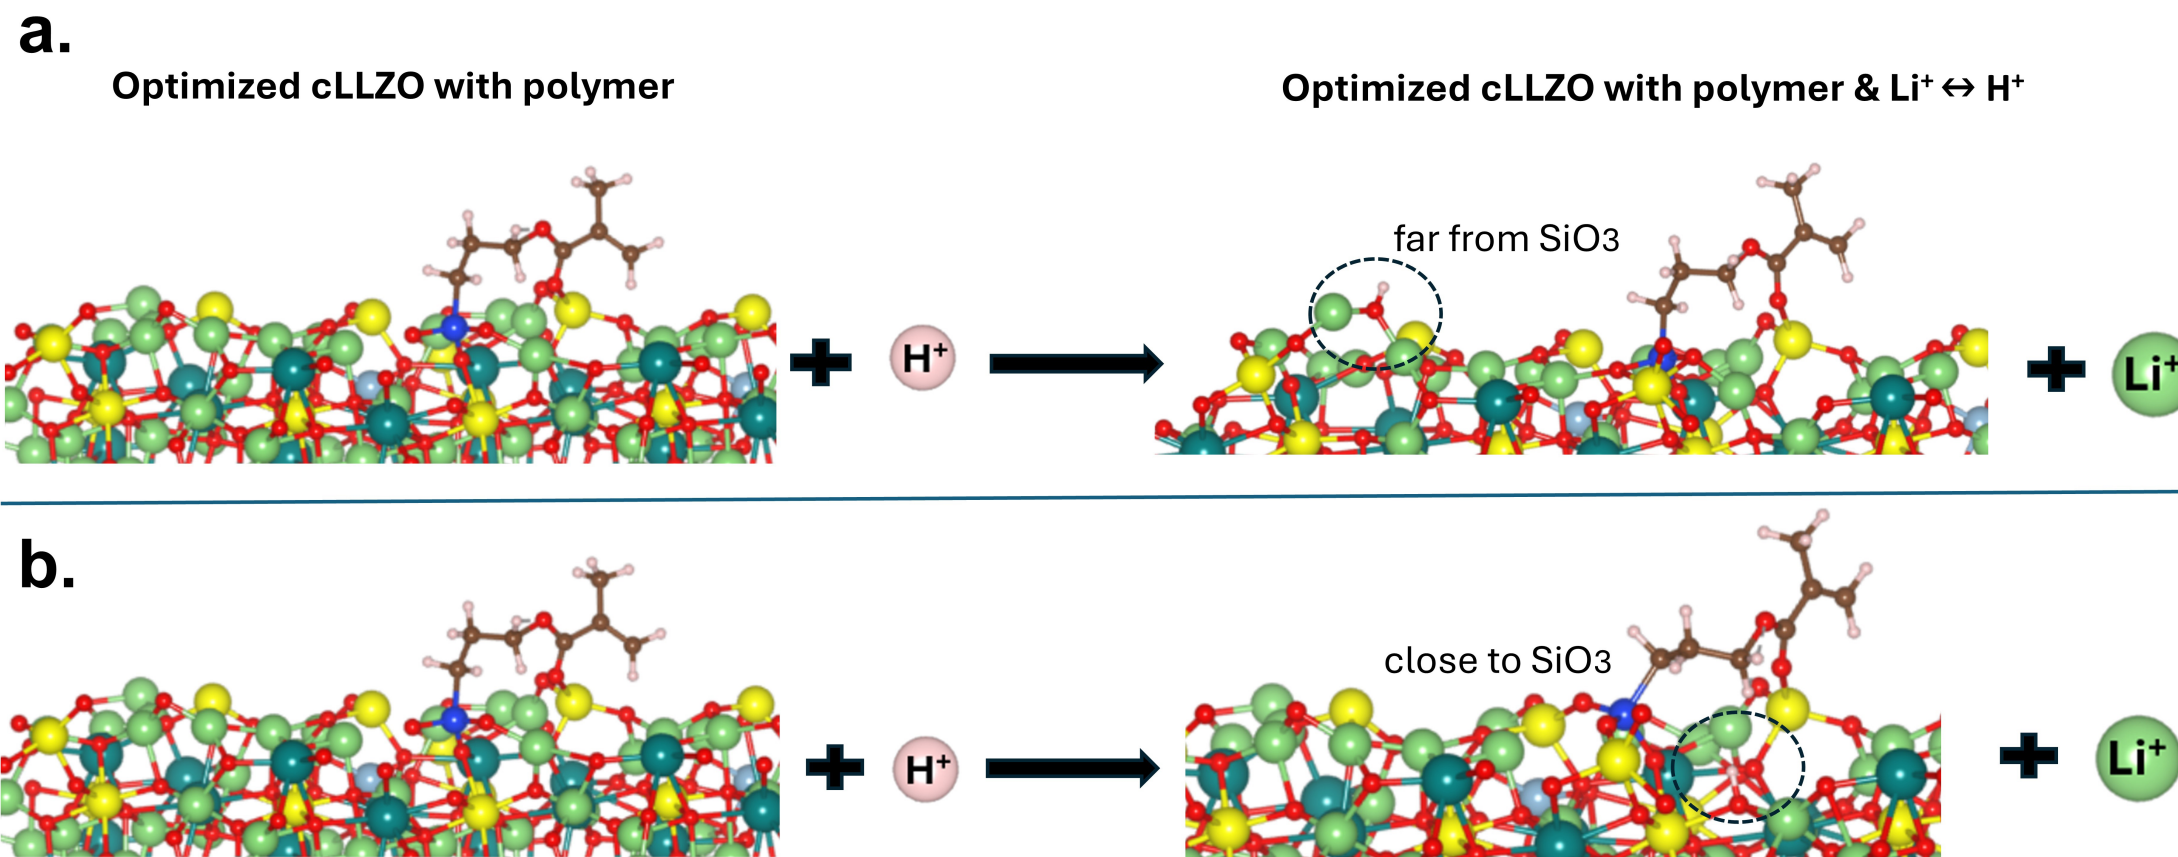

Supplement: d6eb00043f11.pdf [file d6eb00043f11.pdf]

## SI Figure 7

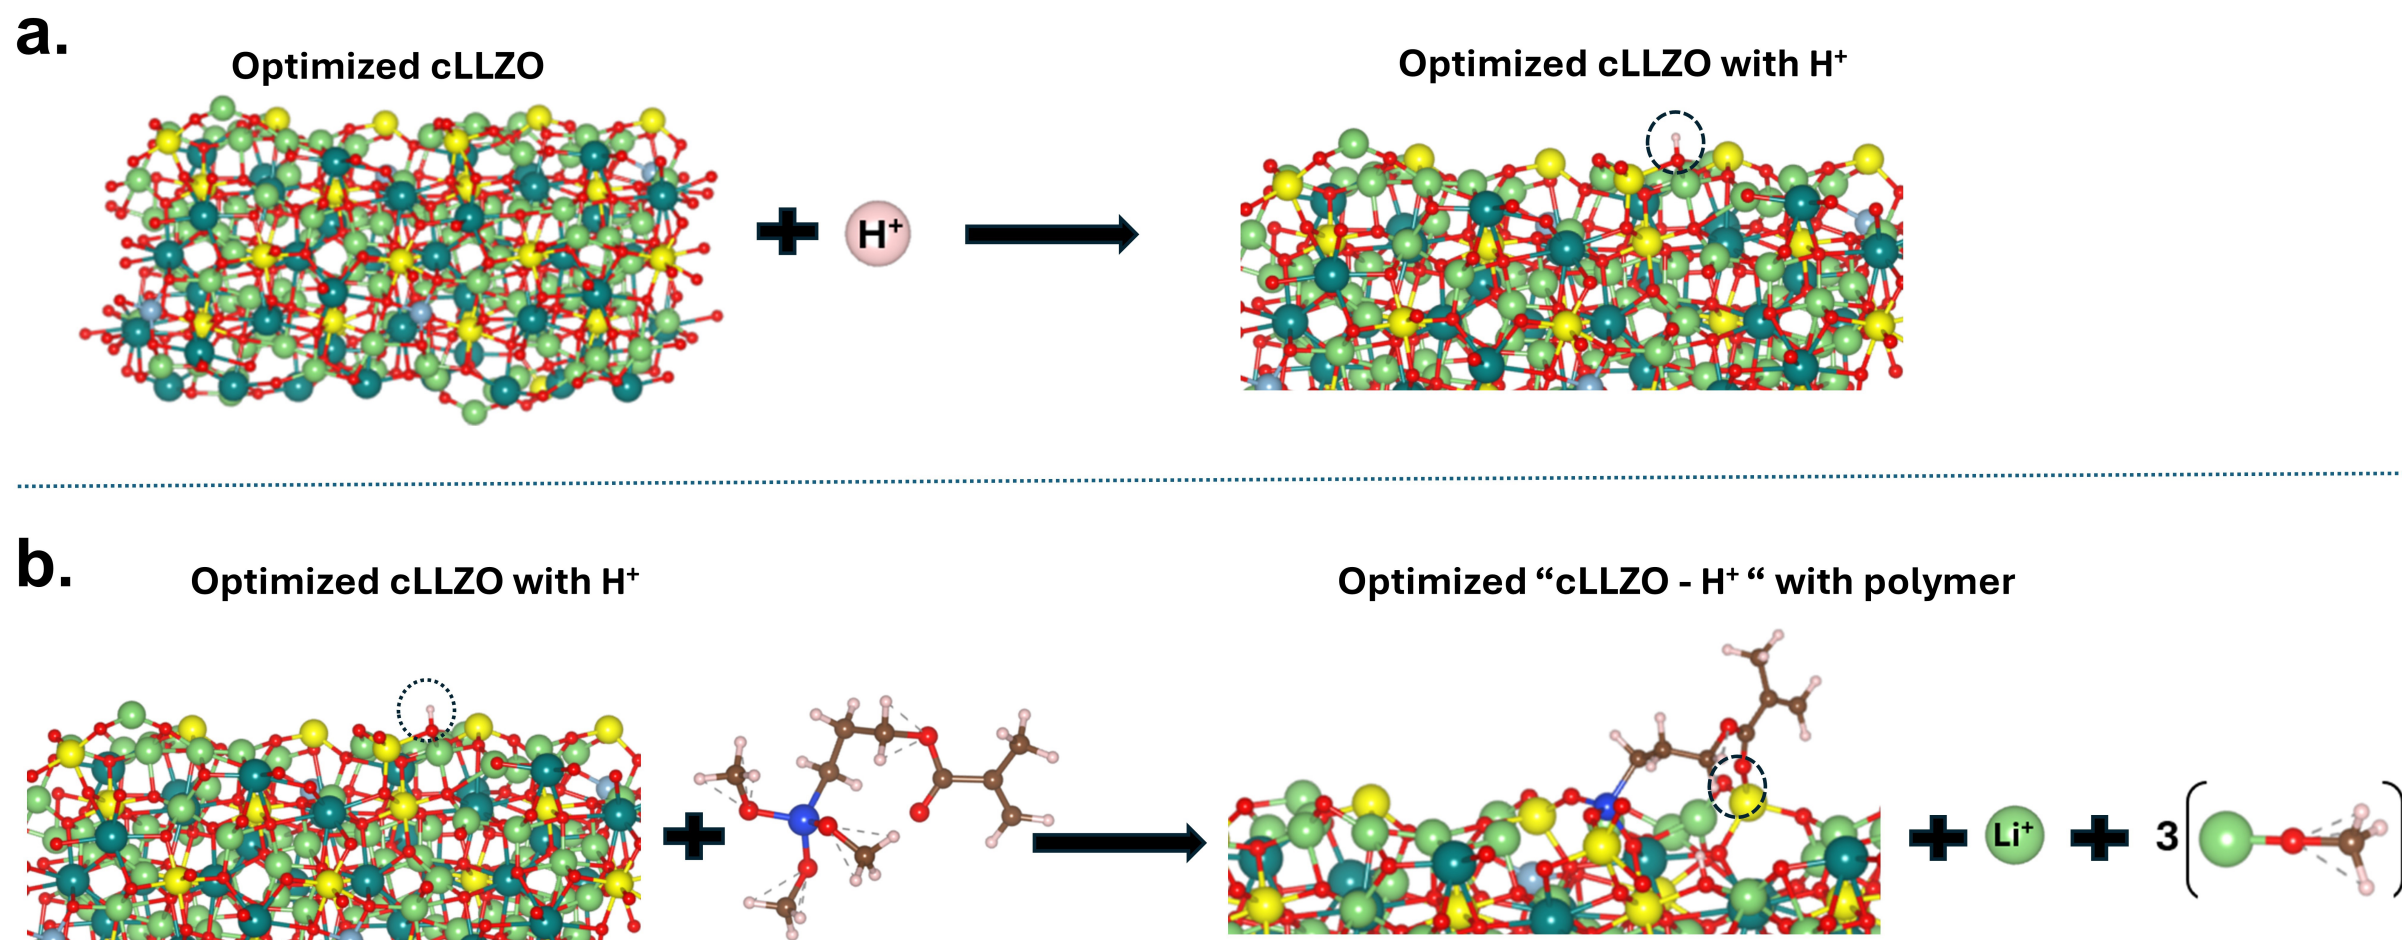

Supplement: d6eb00043f12.pdf [file d6eb00043f12.pdf]

SI Figure 8

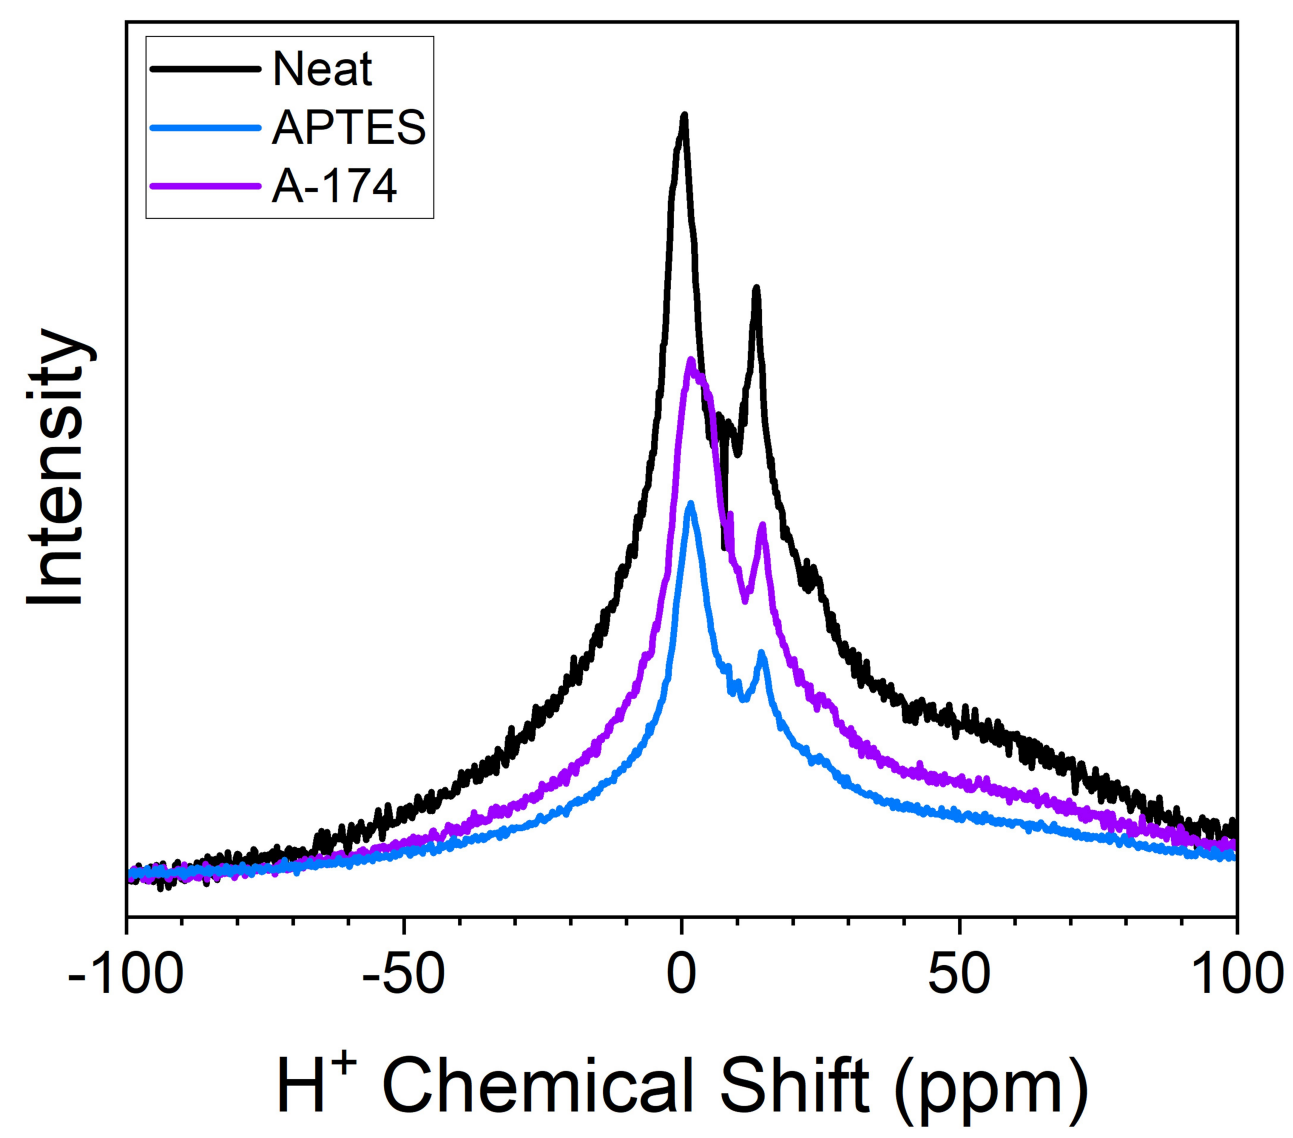

Supplement: d6eb00043f13.pdf [file d6eb00043f13.pdf]

## SI Figure 9

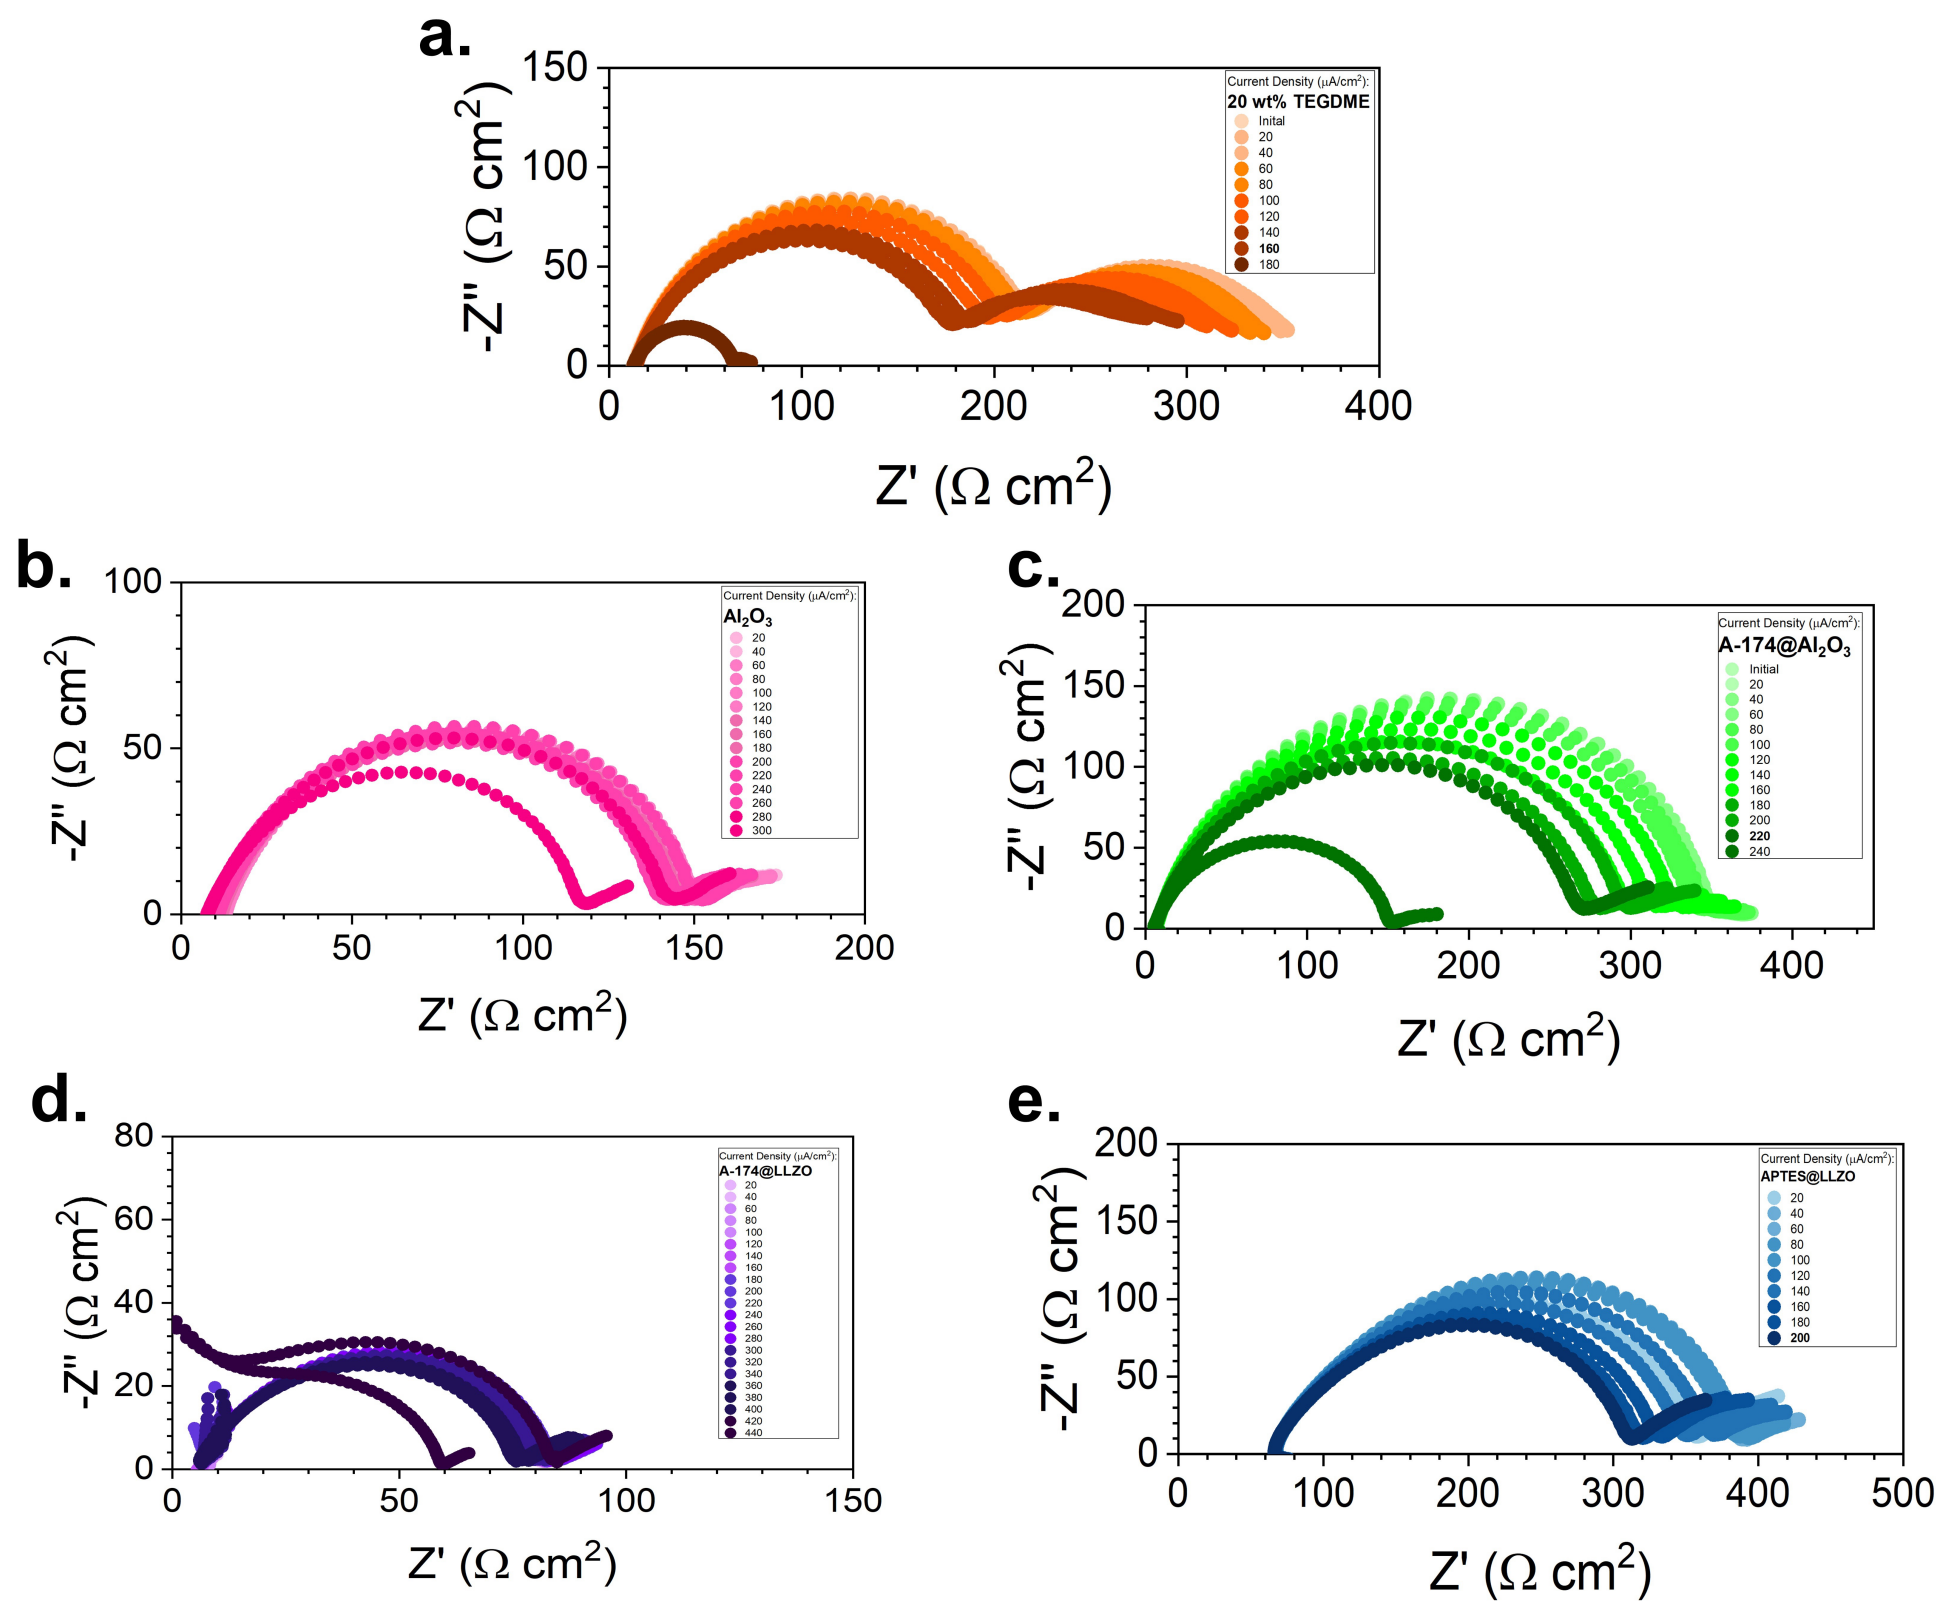

Supplement: d6eb00043f14.pdf [file d6eb00043f14.pdf]

SI Figure 10

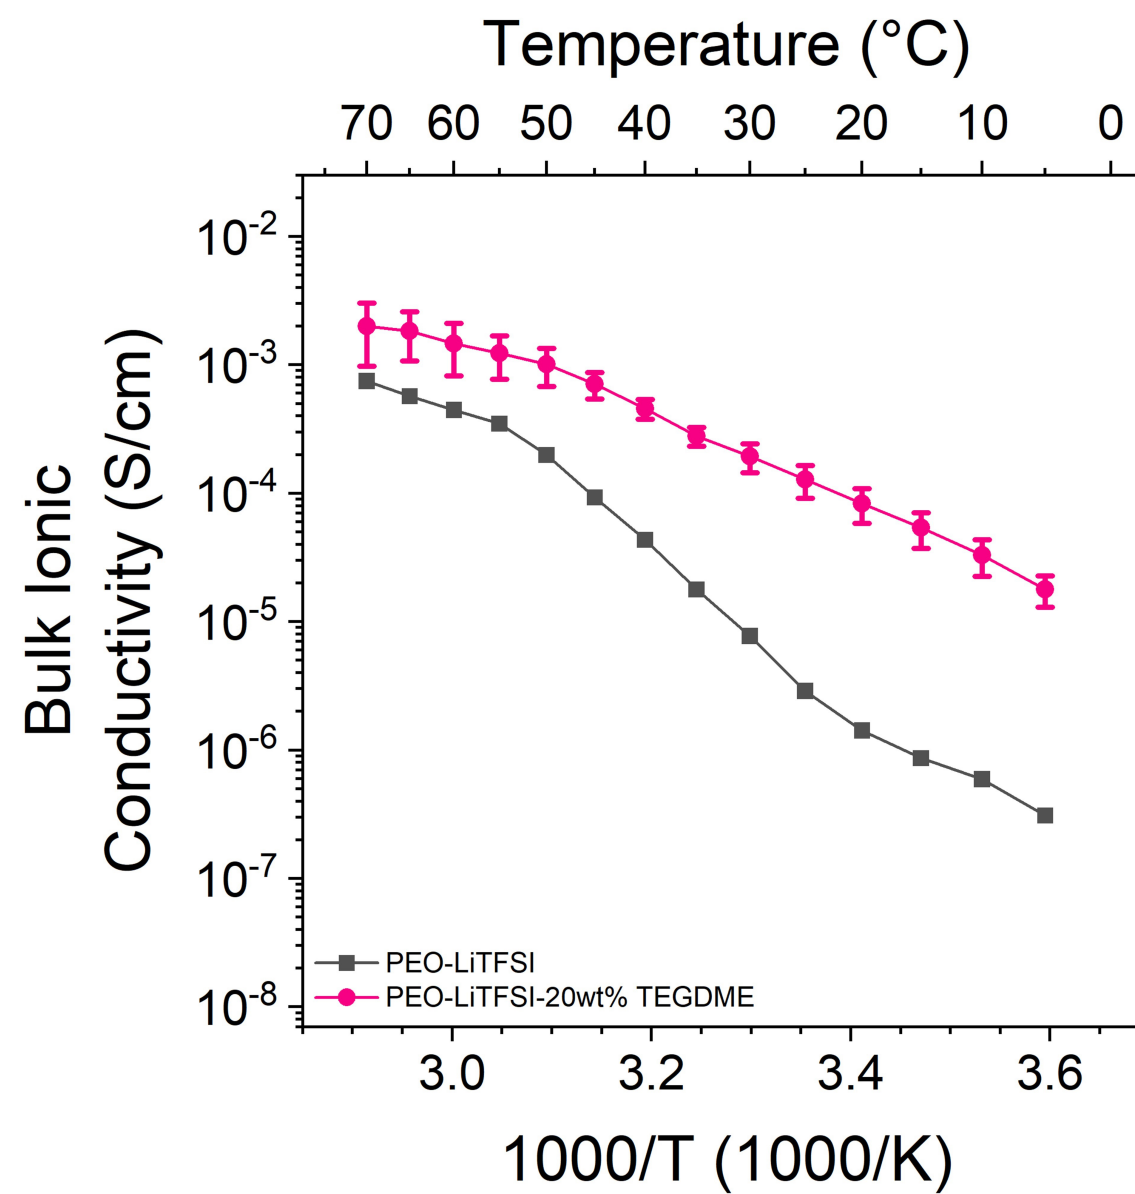

Supplement: d6eb00043f2.pdf [file d6eb00043f2.pdf]

## SI Figure 11

**a.**

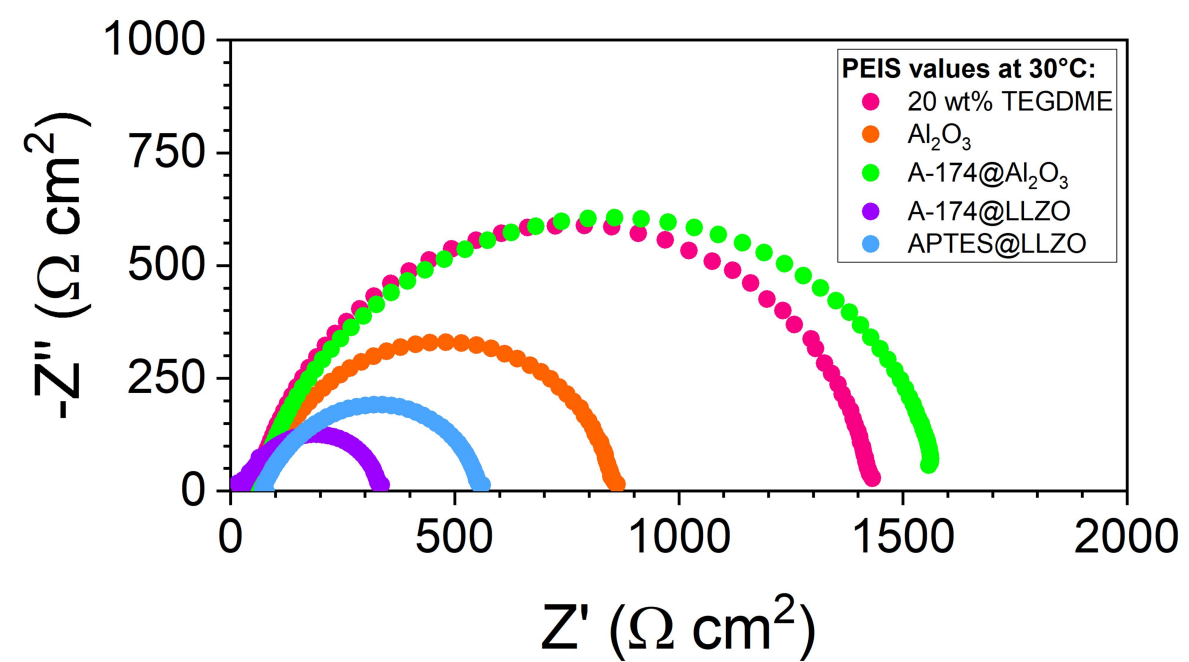

**b.**

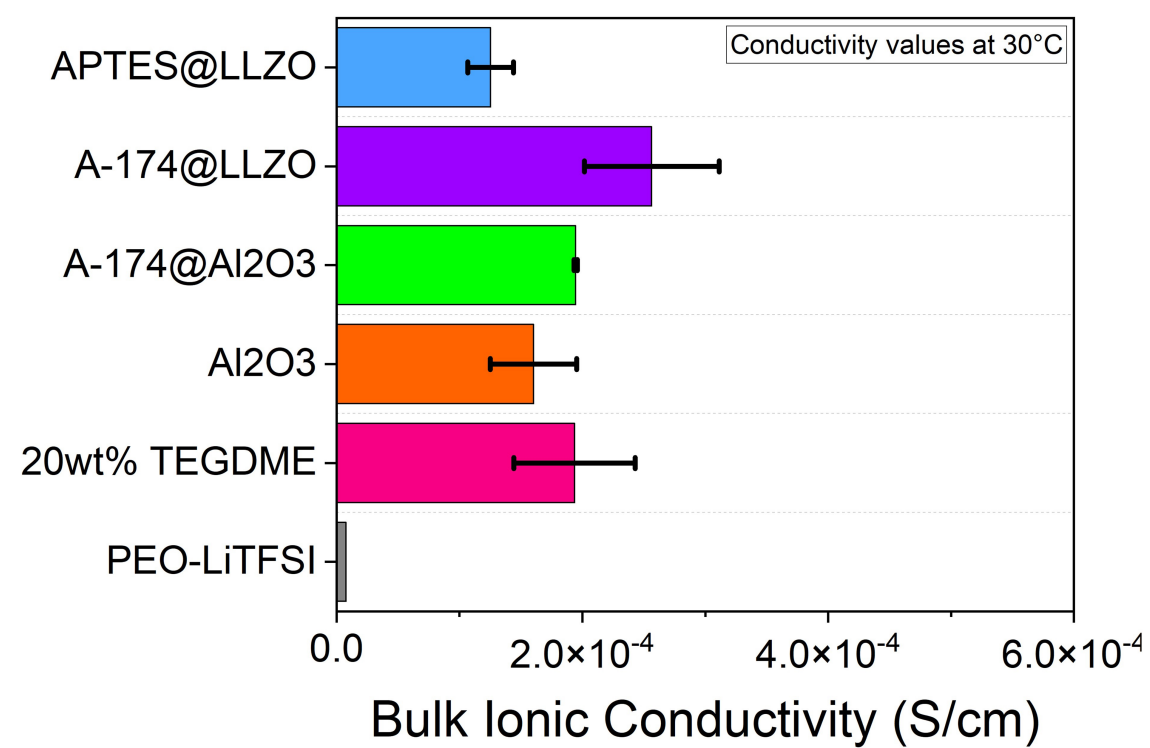

Supplement: d6eb00043f3.pdf [file d6eb00043f3.pdf]

## SI Figure 12

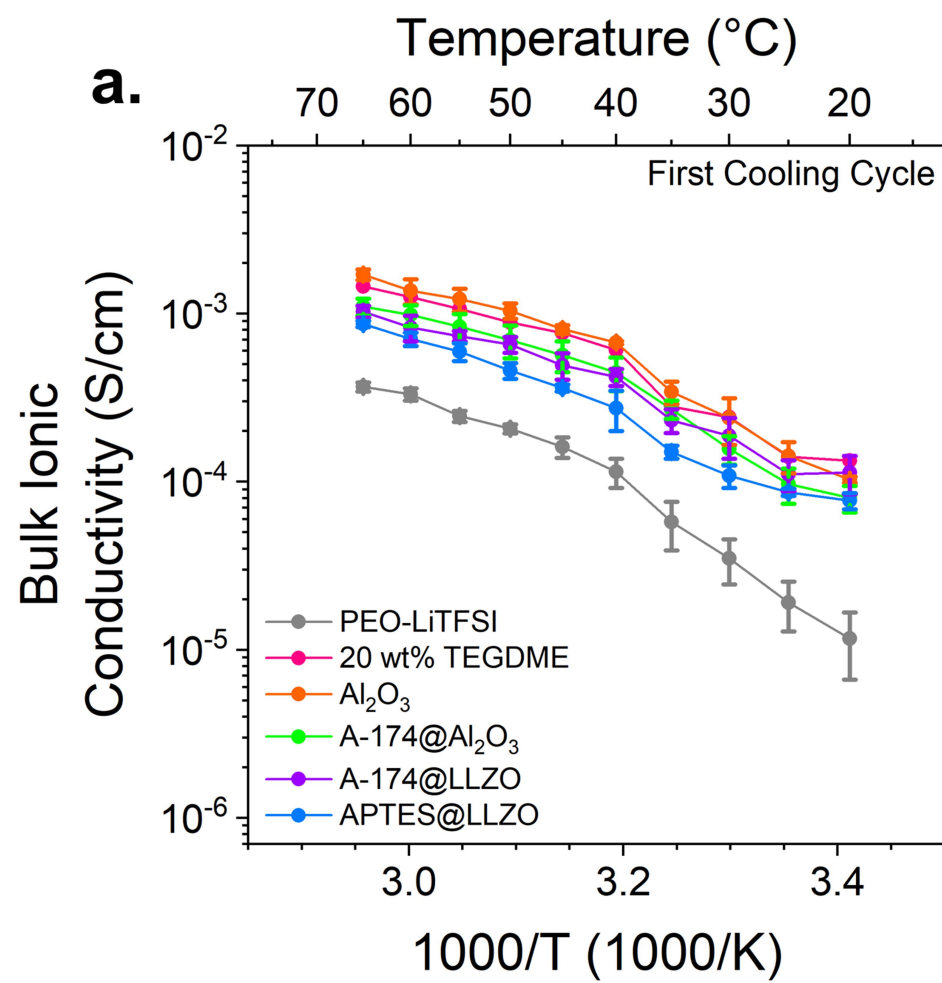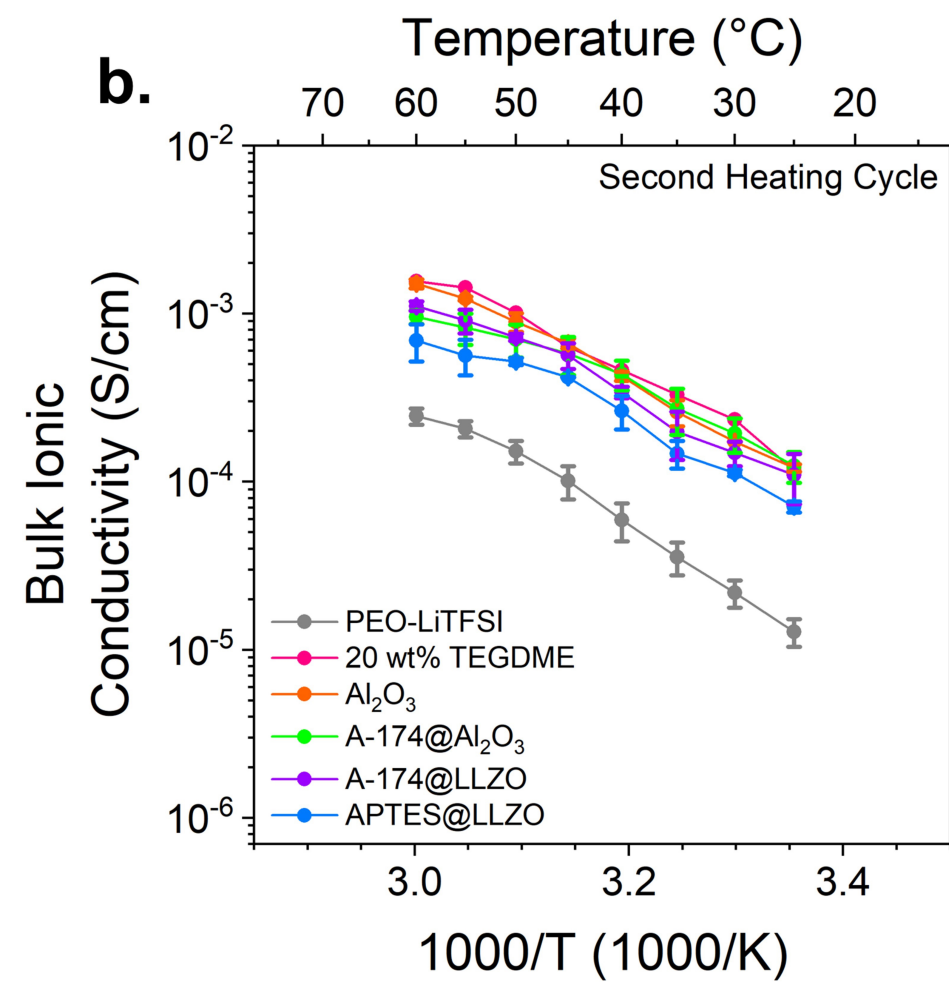

Supplement: d6eb00043f4.pdf [file d6eb00043f4.pdf]

### SI Figure 13

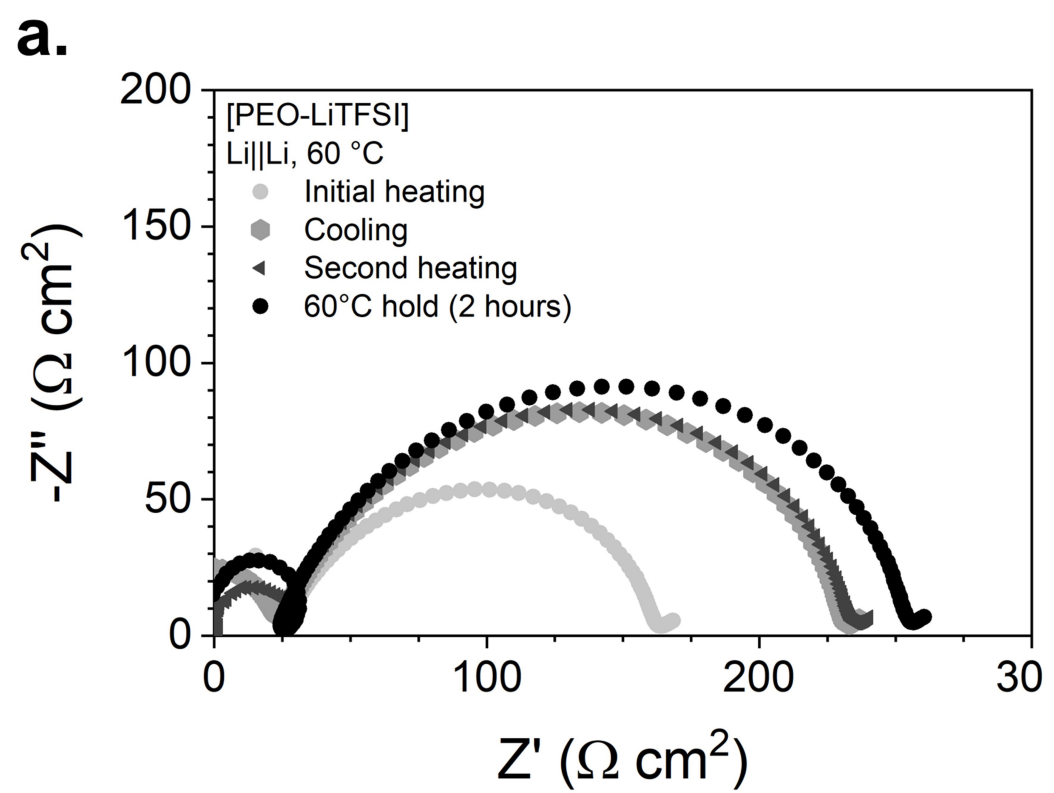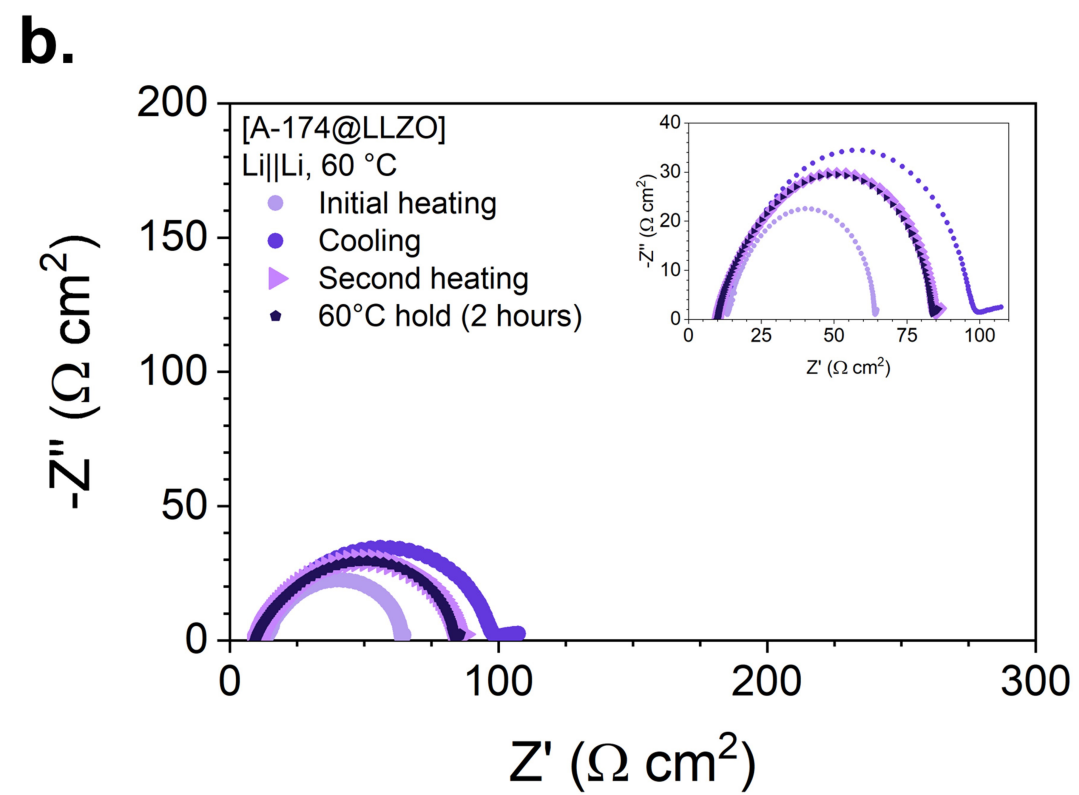

Supplement: d6eb00043f5.pdf [file d6eb00043f5.pdf]

## SI Figure 14

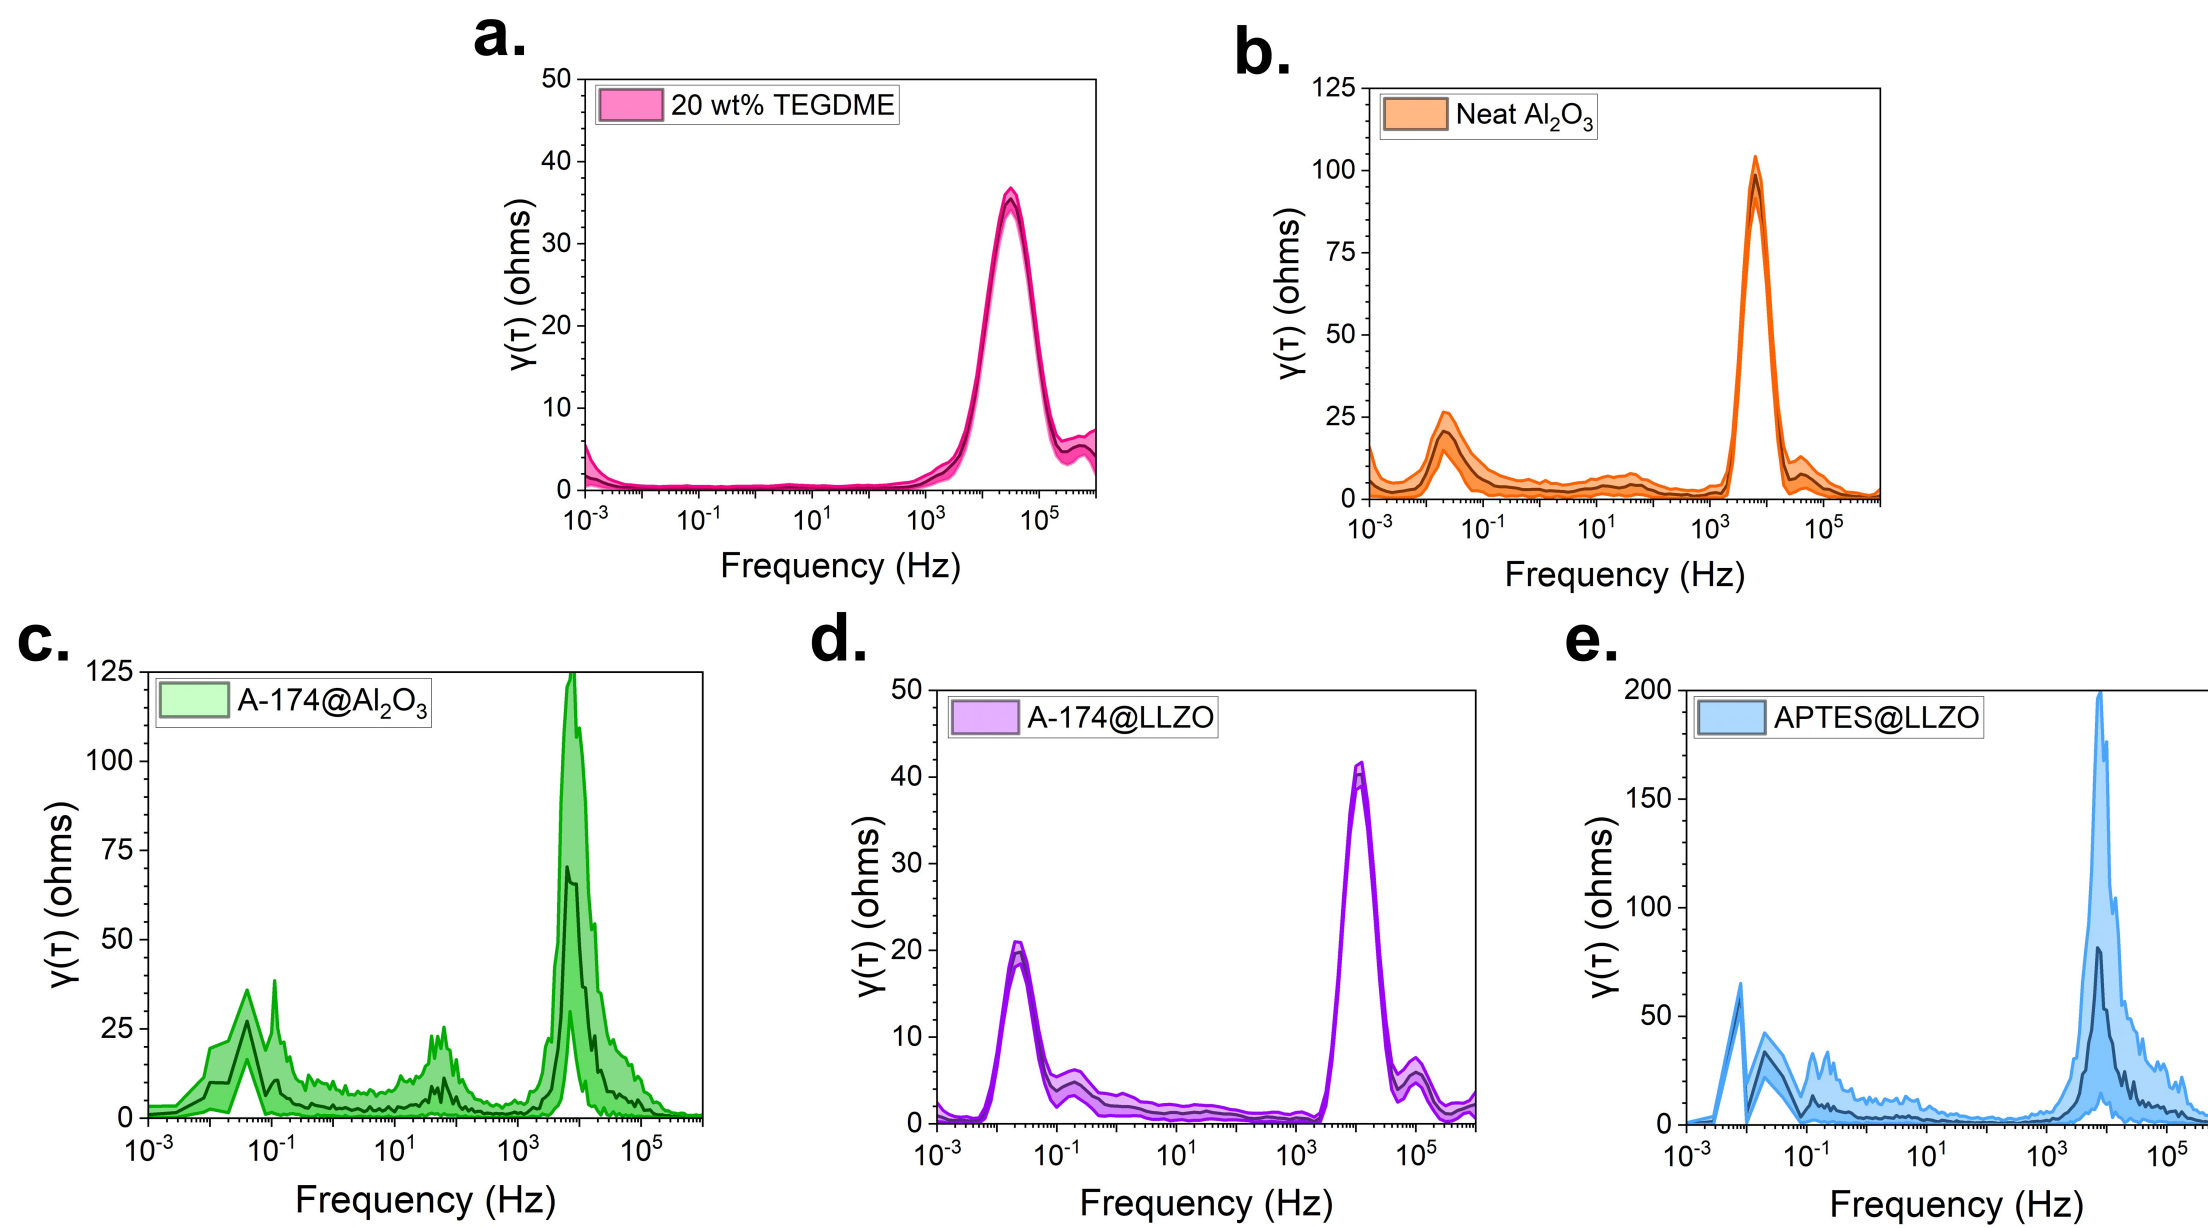

Supplement: d6eb00043f6.pdf [file d6eb00043f6.pdf]

## SI Figure 2

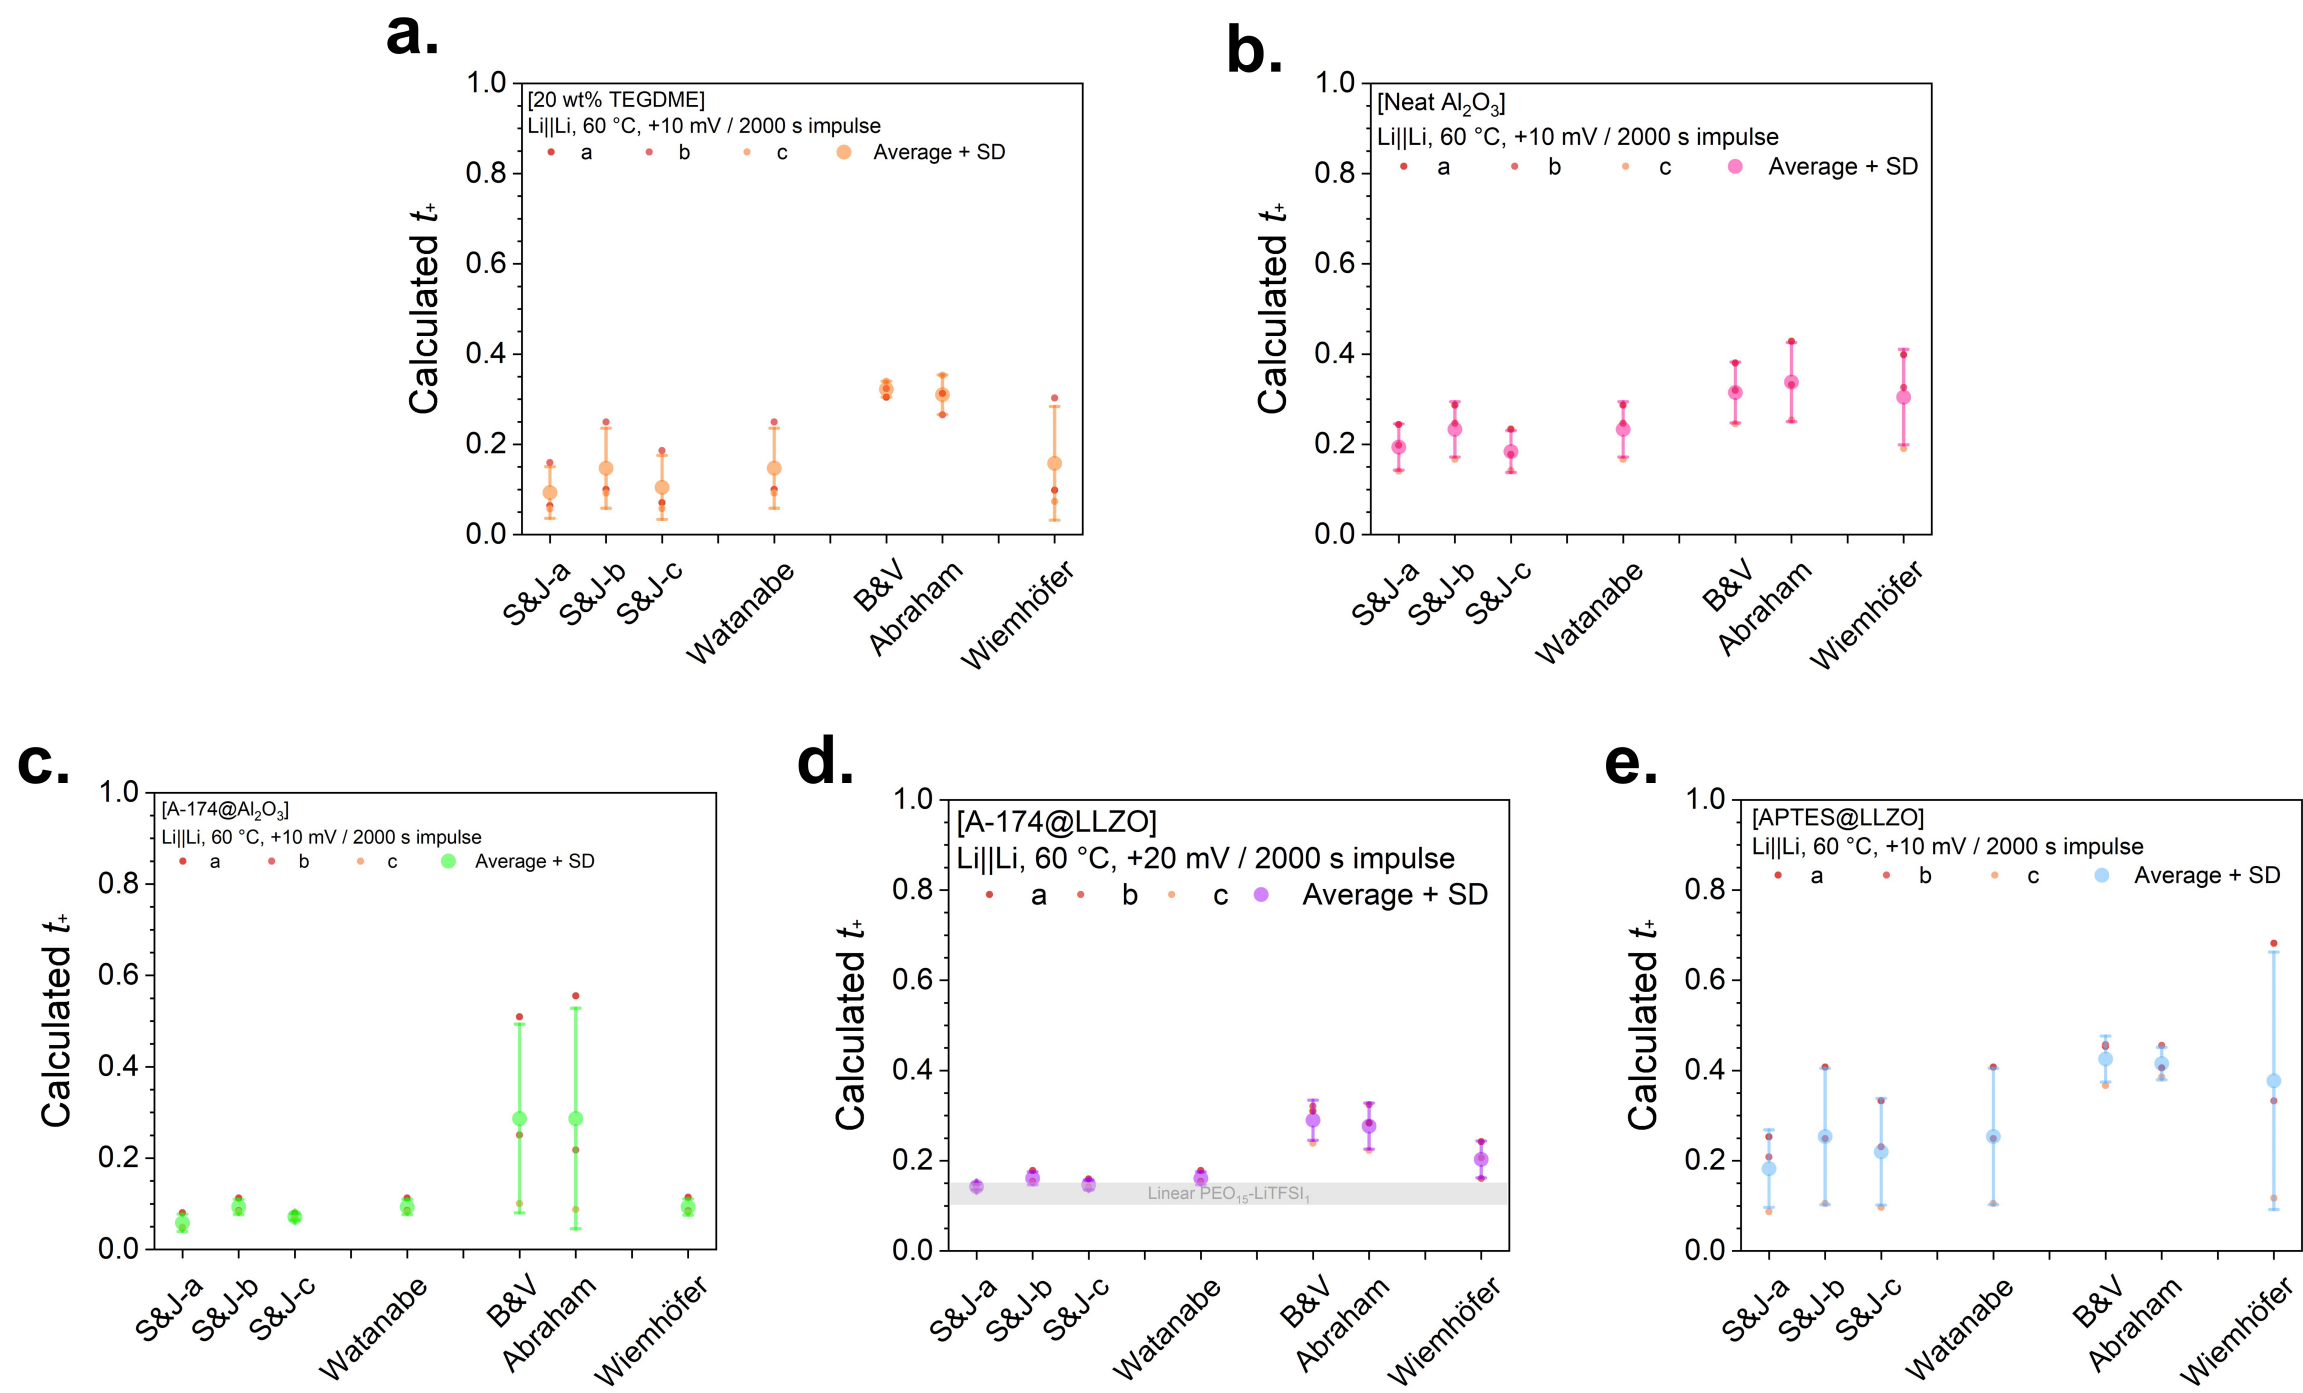

Supplement: d6eb00043f7.pdf [file d6eb00043f7.pdf]

### SI Figure 3

**a.**

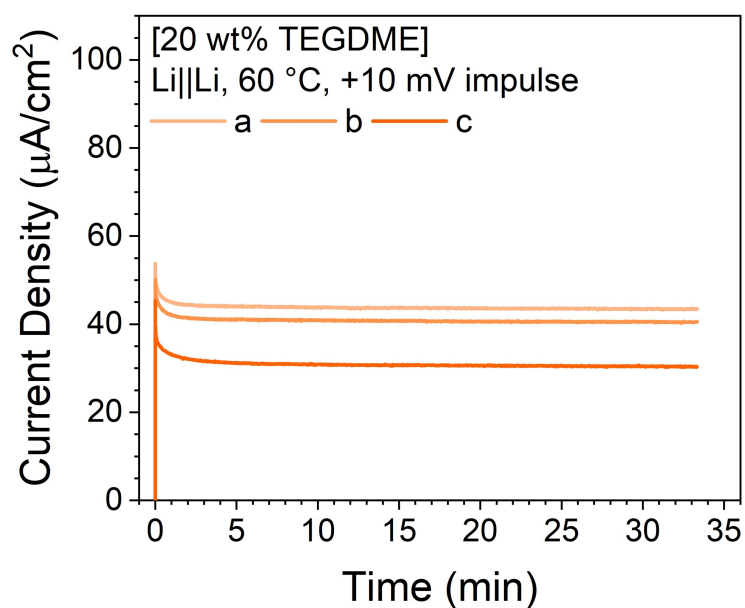

**b.**

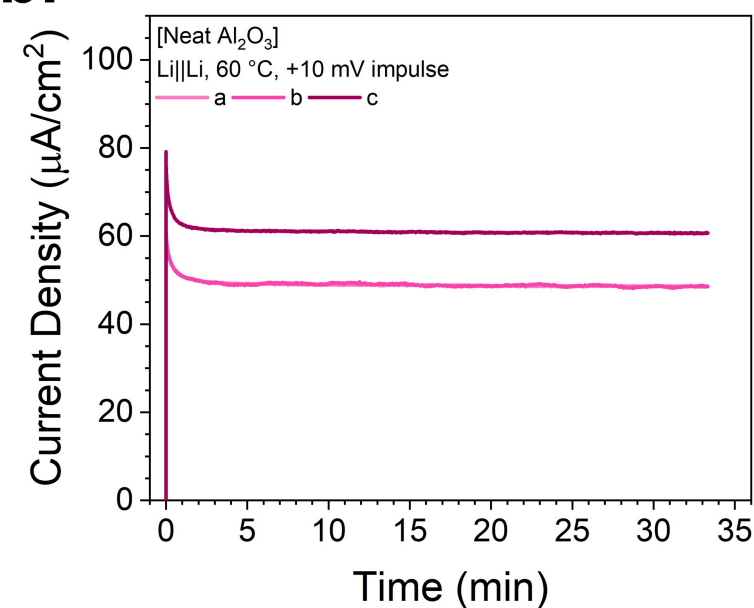

**c.**

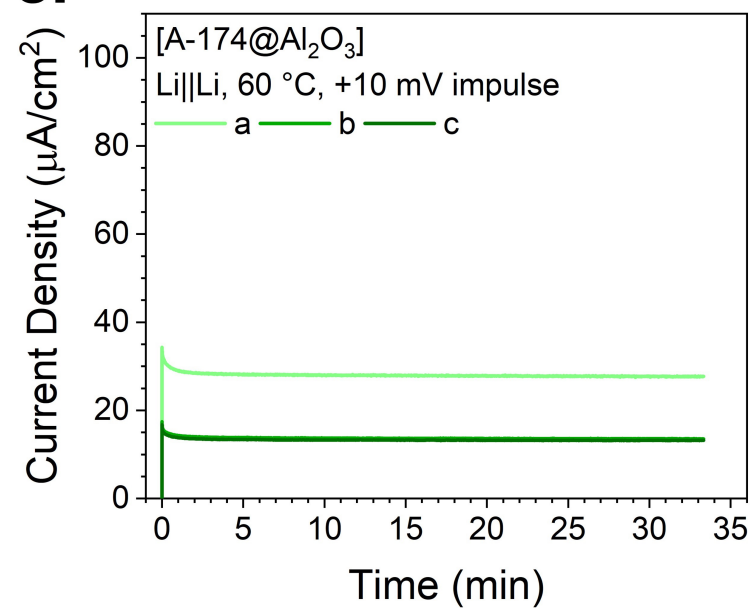

**d.**

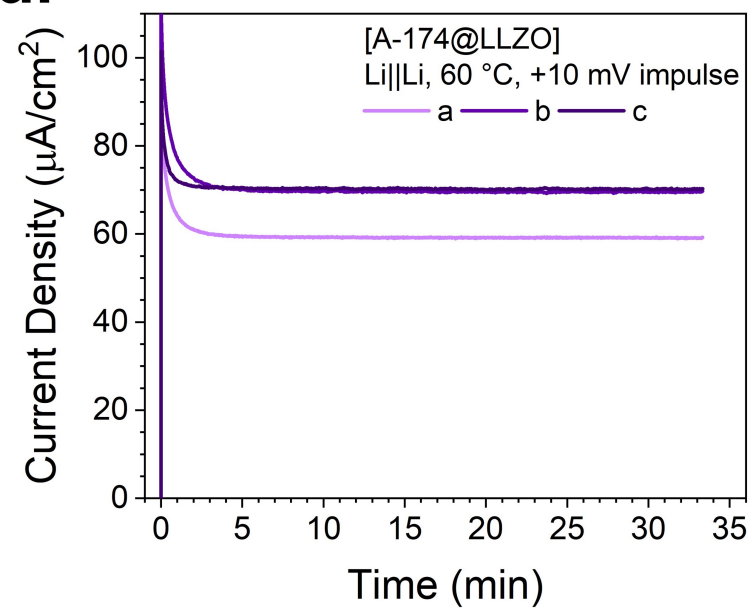

**e.**

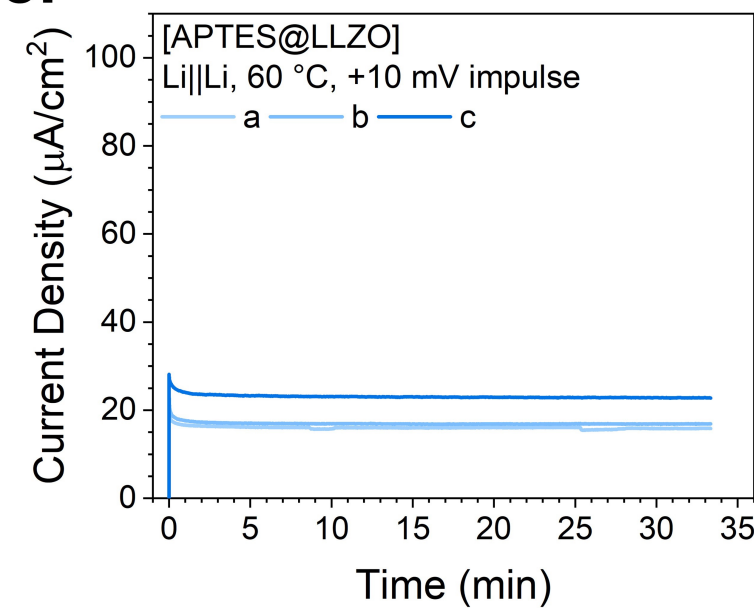

Supplement: d6eb00043f8.pdf [file d6eb00043f8.pdf]
